# Supplementary material
Source: publisher site journal article supplement (https://www.dovepress.com/get_supplementary_file.php?f=497645.docx)
Supplement: Supplementary file 1 [file get_supplementary_file.php]

**Supplementary Information**


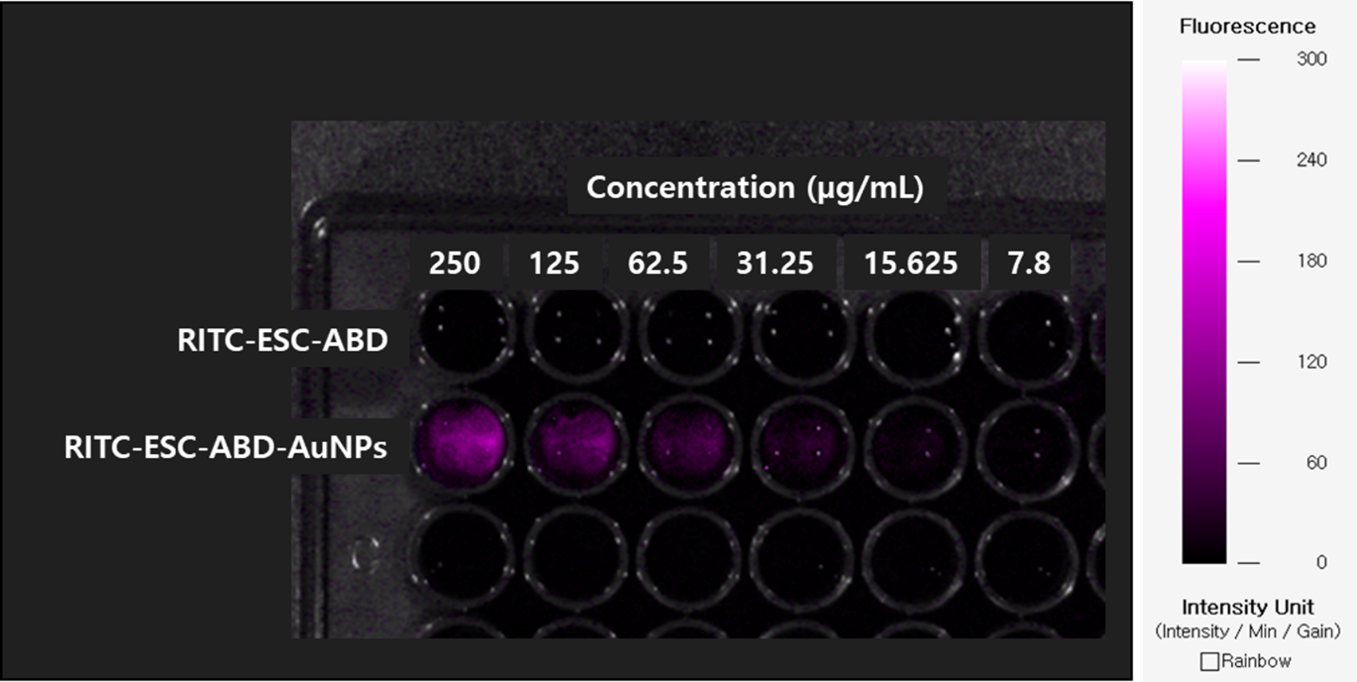


**Supplementary Figure S1. Fluorescence images of rhodamine isothiocyanate (RITC)-labeled ESC-ABD (RITC-ESC-ABD) and ESC-ABD-AuNPs (RITC-ESC-ABD-AuNPs) at different protein concentrations.** The protein concentration was quantified using BCA assay. The samples were initially prepared at a concentration of 250 µg/mL, followed by serial two-fold dilutions to generate a 250-7.8 µg/mL. These were then loaded into a 96-well plate and images were taken with FOBI fluorescence in vivo imaging system (Cellgentek, Osong, Republic of Korea).
